# Supplementary material for: First Report on the Finding of Listeria mnocytogenes ST121 Strain in a Dolphin Brain
Source: PubMed Central journal article supplement (PMC7601084; doi:10.3390/pathogens9100802), 2020-09-28
Supplement: pathogens-09-00802-s001.pdf [file pathogens-09-00802-s001.pdf]

**Table S1.** strains metadata, genome assembly quality and reads accession of the CC121 collection.

| Genome_ID  | Compartment               | Details                  | Country | Year | ST  | Reference         | Contamstatus | Breadth coverage (%) | N50     | Number of Contigs | Largest Contig | Total Assembly Length | Accession (Biosample)     |
|------------|---------------------------|--------------------------|---------|------|-----|-------------------|--------------|----------------------|---------|-------------------|----------------|-----------------------|---------------------------|
| 04CEB235LM | Fish and fishery products | smoked salmon            | FR      | 2004 | 121 | Henri et al. 2016 | False        | 95,86                | 3042512 | 16                | 3042512        | 3112904               | ERS1374952 (SAMEA4475773) |
| 05CEB426LM | Fish and fishery products | salmon                   | FR      | 2005 | 121 | Henri et al. 2016 | False        | 94,55                | 3008570 | 25                | 3008570        | 3081975               | ERS1374954 (SAMEA4475775) |
| 05CEB745LM | Composite dishes          | salmon sandwich          | FR      | 2005 | 121 | Henri et al. 2016 | False        | 96,12                | 3003770 | 9                 | 3003770        | 3066471               | ERS1374964 (SAMEA4475785) |
| 05CEB746LM | Composite dishes          | pizza                    | FR      | 2005 | 121 | Henri et al. 2016 | False        | 95,82                | 3186668 | 11                | 3186668        | 3250531               | ERS1374965 (SAMEA4475786) |
| 06CEB377LM | Processing environment    | surfaces                 | FR      | 2006 | 121 | Henri et al. 2016 | False        | 95,83                | 3033096 | 7                 | 3033096        | 3059429               | ERS1374983 (SAMEA4475804) |
| 06CEB469LM | Composite dishes          | ham and cheese sandwich  | FR      | 2006 | 121 | Henri et al. 2016 | False        | 95,75                | 3185929 | 5                 | 3185929        | 3248006               | ERS1374987 (SAMEA4475808) |
| 06CEB476LM | Composite dishes          | pizza                    | FR      | 2006 | 121 | Henri et al. 2016 | False        | 96,13                | 3002921 | 5                 | 3002921        | 3064685               | ERS1374988 (SAMEA4475809) |
| 07CEB276LM | Fish and fishery products | tarama                   | FR      | 2007 | 121 | Henri et al. 2016 | False        | 95,06                | 2883111 | 2                 | 2883111        | 2944222               | ERS1374993 (SAMEA4475814) |
| 07CEB914LM | Meat and meat products    | poultry meat             | FR      | 2007 | 121 | Henri et al. 2016 | False        | 95,84                | 3001279 | 11                | 3001279        | 3064625               | ERS1374997 (SAMEA4475818) |
| 08CEB07LM  | Processing environment    | surfaces                 | FR      | 2008 | 121 | Henri et al. 2016 | False        | 95,79                | 2996799 | 8                 | 2996799        | 3059301               | ERS1374999 (SAMEA4475820) |
| 08CEB107LM | Composite dishes          | ham and emental sandwich | FR      | 2008 | 121 | Henri et al. 2016 | False        | 95,76                | 3057230 | 8                 | 3057230        | 3059256               | ERS1375001 (SAMEA4475822) |
| 08CEB173LM | Meat and meat products    | Sausage                  | FR      | 2008 | 121 | Henri et al. 2016 | False        | 95,99                | 3050503 | 24                | 3050503        | 3056893               | ERS1375005 (SAMEA4475826) |
| 08CEB196LM | Fish and fishery products | tarama                   | FR      | 2008 | 121 | Henri et al. 2016 | False        | 95,09                | 3035375 | 39                | 3035375        | 3112225               | ERS1375008 (SAMEA4475829) |
| 08CEB214LM | Composite dishes          | rice and seafood         | FR      | 2008 | 121 | Henri et al. 2016 | False        | 95,74                | 2995342 | 11                | 2995342        | 3058999               | ERS1375010 (SAMEA4475831) |

|            |                                      |                         |    |      |     |                   |       |       |         |     |         |         |                              |
|------------|--------------------------------------|-------------------------|----|------|-----|-------------------|-------|-------|---------|-----|---------|---------|------------------------------|
| 08CEB263LM | Processing environment               | surfaces                | FR | 2008 | 121 | Henri et al. 2016 | False | 95,02 | 3003458 | 50  | 3003458 | 3084532 | ERS1375013<br>(SAMEA4475834) |
| 08CEB279LM | Meat and meat products               | merguez                 | FR | 2008 | 121 | Henri et al. 2016 | False | 95,18 | 3062244 | 3   | 3062244 | 3062894 | ERS1375014<br>(SAMEA4475835) |
| 08CEB44LM  | Composite dishes                     | tortellini ricotta      | FR | 2008 | 121 | Henri et al. 2016 | False | 95,28 | 3047336 | 12  | 3047336 | 3111304 | ERS1375017<br>(SAMEA4475838) |
| 08CEB473LM | Meat and meat products               | ham                     | FR | 2008 | 121 | Henri et al. 2016 | False | 95,41 | 2987822 | 97  | 2987822 | 3081607 | ERS1375018<br>(SAMEA4475839) |
| 08CEB53LM  | Composite dishes                     | sandwich jambon fromage | FR | 2008 | 121 | Henri et al. 2016 | False | 95,14 | 3061033 | 5   | 3061033 | 3067428 | ERS1375019<br>(SAMEA4475840) |
| 08CEB54LM  | Fruit, vegetables, cereals and herbs | tomatoes                | FR | 2008 | 121 | Henri et al. 2016 | False | 95,73 | 2996761 | 6   | 2996761 | 3058875 | ERS1375020<br>(SAMEA4475841) |
| 08CEB61LM  | Milk and milk products               | cheese                  | FR | 2008 | 121 | Henri et al. 2016 | False | 95,12 | 3096728 | 5   | 3096728 | 3097782 | ERS1375022<br>(SAMEA4475843) |
| 08CEB73LM  | Fruit, vegetables, cereals and herbs | pineapple- fresh        | FR | 2008 | 121 | Henri et al. 2016 | False | 95,93 | 2998389 | 9   | 2998389 | 3061149 | ERS1375023<br>(SAMEA4475844) |
| 09CEB328LM | Composite dishes                     | pate en crouete         | FR | 2009 | 121 | Henri et al. 2016 | False | 94,81 | 3070283 | 13  | 3070283 | 3136651 | ERS1375030<br>(SAMEA4475851) |
| 09CEB333LM | Meat and meat products               | cooked chicken          | FR | 2009 | 121 | Henri et al. 2016 | False | 95,14 | 3062058 | 1   | 3062058 | 3062058 | ERS1375031<br>(SAMEA4475852) |
| 09CEB351LM | Composite dishes                     | tomate farcies          | FR | 2009 | 121 | Henri et al. 2016 | False | 95,25 | 3070738 | 199 | 3070738 | 3156028 | ERS1375036<br>(SAMEA4475857) |
| 09CEB373LM | Meat and meat products               | sausage                 | FR | 2009 | 121 | Henri et al. 2016 | False | 94,72 | 2995793 | 28  | 2995793 | 3068888 | ERS1375041<br>(SAMEA4475862) |
| 09CEB379LM | Processing environment               | surfaces                | FR | 2009 | 121 | Henri et al. 2016 | False | 94,98 | 3001814 | 29  | 3001814 | 3074479 | ERS1375042<br>(SAMEA4475863) |
| 09CEB575LM | Fish and fishery products            | tarama                  | FR | 2009 | 121 | Henri et al. 2016 | False | 95,15 | 3098158 | 15  | 3098158 | 3164581 | ERS1375044<br>(SAMEA4475865) |
| 09CEB684LM | Fish and fishery products            | salmon                  | FR | 2009 | 121 | Henri et al. 2016 | False | 95,96 | 3064053 | 4   | 3064053 | 3125658 | ERS1375049<br>(SAMEA4475870) |
| 09CEB734LM | Meat and meat products               | escalope poulet         | FR | 2009 | 121 | Henri et al. 2016 | False | 94,98 | 3066434 | 2   | 3066434 | 3066759 | ERS1375050<br>(SAMEA4475871) |

|             |                           |                           |    |      |     |                    |       |       |         |    |         |         |                              |
|-------------|---------------------------|---------------------------|----|------|-----|--------------------|-------|-------|---------|----|---------|---------|------------------------------|
| 09CEB835LM  | Composite dishes          | jambon persillé           | FR | 2009 | 121 | Henri et al. 2016  | False | 95,13 | 3092559 | 11 | 3092559 | 3097109 | ERS1375051<br>(SAMEA4475872) |
| 09CEB864LM  | Meat and meat products    | lardons fumés             | FR | 2009 | 121 | Henri et al. 2016  | False | 94,59 | 2958954 | 21 | 2958954 | 3027057 | ERS1375053<br>(SAMEA4475874) |
| 09CEB924LM  | Meat and meat products    | spliced poultry meat      | FR | 2009 | 121 | Henri et al. 2016  | False | 95,23 | 3030289 | 45 | 3030289 | 3110220 | ERS1375056<br>(SAMEA4475877) |
| 10CEB339LM  | Composite dishes          | pork salade               | FR | 2010 | 121 | Henri et al. 2016  | False | 96,16 | 3141738 | 36 | 3141738 | 3161160 | ERS1375059<br>(SAMEA4475880) |
| 10CEB630LM  | Fish and fishery products | smoked salmon             | FR | 2010 | 121 | Henri et al. 2016  | False | 96,16 | 3002019 | 22 | 3002019 | 3069021 | ERS1375065<br>(SAMEA4475886) |
| 10CEB631LM  | Fish and fishery products | smoked salmon             | FR | 2010 | 121 | Henri et al. 2016  | False | 95,91 | 3065437 | 8  | 3065437 | 3128299 | ERS1375066<br>(SAMEA4475887) |
| 11CEB367LM  | Processing environment    | surfaces                  | FR | 2011 | 121 | Henri et al. 2016  | False | 96    | 3032861 | 7  | 3032861 | 3095474 | ERS1375085<br>(SAMEA4475906) |
| 11CEB403LM  | Fish and fishery products | smoked salmon             | FR | 2011 | 121 | Henri et al. 2016  | False | 95,84 | 3069573 | 2  | 3069573 | 3094360 | ERS1375088<br>(SAMEA4475909) |
| 11CEB431LM  | Fish and fishery products | Fish and fishery products | FR | 2011 | 121 | Fritch et al. 2019 | False | 95,31 | 3086193 | 3  | 3086193 | 3087055 | SAMEA7290422                 |
| 12CEB1306LM | Fish and fishery products | smoked trout              | FR | 2012 | 121 | Henri et al. 2016  | False | 95,01 | 2995281 | 1  | 2995281 | 2995281 | ERS1375099<br>(SAMEA4475920) |
| 13CEB777LM  | Fish and fishery products | smoked trout              | FR | 2013 | 121 | Henri et al. 2016  | False | 95,98 | 3034253 | 11 | 3034253 | 3097867 | ERS1375108<br>(SAMEA4475929) |
| 14SEL875LM  | Processing environment    | #N/A                      | FR | 2014 | 121 | Fritch et al. 2019 | False | 95,24 | 3055756 | 1  | 3055756 | 3055756 | ERS2647086<br>(SAMEA4827204) |
| 15SEL1647LM | Composite dishes          | chapelure                 | IE | 2014 | 121 | this study         | False | 95,5  | 3091656 | 6  | 3091656 | 3093399 | SAMEA7290423                 |
| 15SEL1648LM | Composite dishes          | chapelure                 | IE | 2014 | 121 | this study         | False | 95,61 | 3092698 | 6  | 3092698 | 3095339 | SAMEA7290424                 |
| 15SEL1652LM | composite dishes          | farce                     | IE | 2014 | 121 | this study         | False | 95,64 | 3090620 | 6  | 3090620 | 3092195 | SAMEA7290425                 |
| 15SEL1661LM | Composite dishes          | sandwich                  | IE | 2014 | 121 | this study         | False | 95,6  | 3093410 | 2  | 3093410 | 3093810 | SAMEA7290426                 |

|             |                           |                                |    |      |     |            |       |       |         |    |         |         |              |
|-------------|---------------------------|--------------------------------|----|------|-----|------------|-------|-------|---------|----|---------|---------|--------------|
| 15SEL1665LM | Composite dishes          | chapelure                      | IE | 2014 | 121 | this study | False | 95,77 | 3093453 | 2  | 3093453 | 3093736 | SAMEA7290427 |
| 15SEL1669LM | vegetable                 | romarin roti                   | IE | 2012 | 121 | this study | False | 95,68 | 3143013 | 9  | 3143013 | 3147982 | SAMEA7290428 |
| 15SEL1673LM | Meat and meat products    | ham and chicken meat           | IE | 2012 | 121 | this study | False | 95,76 | 3148182 | 6  | 3148182 | 3154306 | SAMEA7290429 |
| 15SEL1681LM | Composite dishes          | brocoli pie                    | IE | 2013 | 121 | this study | False | 95,8  | 3149222 | 5  | 3149222 | 3154560 | SAMEA7290430 |
| 15SEL1685LM | Composite dishes          | tourte viande hachée           | IE | 2013 | 121 | this study | False | 95,87 | 3098720 | 8  | 3098720 | 3106665 | SAMEA7290431 |
| 15SEL1688LM | vegetable                 | vegetable                      | IE | 2014 | 121 | this study | False | 95,91 | 3149062 | 9  | 3149062 | 3155350 | SAMEA7290432 |
| 15SEL1694LM | Composite dishes          | sauce                          | IE | 2014 | 121 | this study | False | 95,6  | 3098419 | 12 | 3098419 | 3111395 | SAMEA7290433 |
| 15SEL1757LM | Processing environment    | lingette surface               | FR | 2015 | 121 | this study | False | 95,79 | 3090170 | 7  | 3090170 | 3092951 | SAMEA7290434 |
| 15SEL1761LM | Processing environment    | lingette                       | FR | 2014 | 121 | this study | False | 95,78 | 3029016 | 6  | 3029016 | 3091188 | SAMEA7290435 |
| 15SEL1762LM | Composite dishes          | cabillaud et légume (traiteur) | FR | 2011 | 121 | this study | False | 95,42 | 3027357 | 10 | 3027357 | 3095142 | SAMEA7290436 |
| 15SEL701LM  | Processing environment    | lingette                       | FR | 2015 | 121 | this study | False | 95,84 | 3001024 | 2  | 3001024 | 3062002 | SAMEA7290437 |
| 16SEL1299LM | Wild animals              | wildboar livers                | DE | 2012 | 121 | this study | False | 94,52 | 2915299 | 10 | 2915299 | 2981654 | SAMEA7290438 |
| 16SEL787LM  | Processing environment    | remplisseur saucisse           | MK | 2012 | 121 | this study | False | 95,54 | 2987821 | 10 | 2987821 | 3054222 | SAMEA7290439 |
| 16SEL791LM  | Processing environment    | mixieur viande                 | MK | 2011 | 121 | this study | False | 94,48 | 2951143 | 16 | 2951143 | 3047671 | SAMEA7290440 |
| 16SEL792LM  | Meat and meat products    | viande hachée                  | MK | 2010 | 121 | this study | False | 94,66 | 2979671 | 8  | 2979671 | 3051840 | SAMEA7290441 |
| 16SEL793LM  | Meat and meat products    | pork carcass                   | MK | 2012 | 121 | this study | False | 94,26 | 2952047 | 38 | 2952047 | 3073373 | SAMEA7290442 |
| 17SEL409LM  | Fish and fishery products | salmon                         | FR | 2017 | 121 | this study | False | 95,09 | 2544496 | 5  | 2544496 | 2612191 | SAMEA7290443 |
| 17SEL410LM  | Processing environment    | lingette peleuse               | FR | 2017 | 121 | this study | False | 95,11 | 3027123 | 6  | 3027123 | 3095116 | SAMEA7290444 |
| 17SEL47LM   | Fish and fishery products | smocked salmon                 | FR | 2017 | 121 | this study | False | 94,95 | 3029293 | 11 | 3029293 | 3093554 | SAMEA7290445 |

|                |                                      |                                                                            |    |      |     |                   |       |       |         |    |         |         |                           |
|----------------|--------------------------------------|----------------------------------------------------------------------------|----|------|-----|-------------------|-------|-------|---------|----|---------|---------|---------------------------|
| 17SEL48LM      | Fish and fishery products            | smocked salmon                                                             | FR | 2017 | 121 | this study        | False | 95,14 | 3095395 | 26 | 3095395 | 3101623 | SAMEA7290446              |
| 17SEL64LM      | Meat and meat products               | merguez (beef)                                                             | FR | 2017 | 121 | this study        | False | 95,19 | 3000249 | 6  | 3000249 | 3068322 | SAMEA7290447              |
| 18SEL586LM     | Soil & farm environment              | sewage water                                                               | CZ | 2018 | 121 | this study        | False | 94,64 | 2914084 | 5  | 2914084 | 2976083 | SAMEA7290448              |
| 18SEL589LM     | Soil & farm environment              | sewage water                                                               | CZ | 2018 | 121 | this study        | False | 94,8  | 2964719 | 5  | 2964719 | 3021379 | SAMEA7290449              |
| AT-CO-M-SA-280 | Fruit, vegetables, cereals and herbs | mixed food RTE - delicatessen salad, marinated, with pasta, ham and cheese | AT | 2019 | 121 | Felix et al. 2020 | False | 94,08 | 2994987 | 4  | 2994987 | 3056586 | ERS4773663 (SAMEA7005833) |
| AT-CO-V-FZ-266 | Fruit, vegetables, cereals and herbs | mixed food - vegan Thai-Green-Curry, frozen                                | AT | 2016 | 121 | Felix et al. 2020 | False | 94,7  | 3067310 | 26 | 3067310 | 3127038 | ERS4773666 (SAMEA7005836) |
| AT-FI-F-FF-225 | Fish and fishery products            | fish - gravad salmon                                                       | AT | 2016 | 121 | Felix et al. 2020 | False | 94,39 | 3029668 | 6  | 3029668 | 3031715 | ERS4773686 (SAMEA7005856) |
| AT-FI-F-FF-233 | Fish and fishery products            | fish - gravad salmon, sliced                                               | AT | 2018 | 121 | Felix et al. 2020 | False | 92,97 | 2877630 | 33 | 2877630 | 2997611 | ERS4773687 (SAMEA7005857) |
| AT-FI-F-SM-229 | Fish and fishery products            | fish - smoked salmon                                                       | AT | 2017 | 121 | Felix et al. 2020 | False | 93,72 | 3074327 | 15 | 3074327 | 3105139 | ERS4773691 (SAMEA7005861) |
| AT-FI-F-SM-236 | Fish and fishery products            | fish - smoked salmon                                                       | AT | 2018 | 121 | Felix et al. 2020 | False | 93,57 | 2995128 | 19 | 2995128 | 3062373 | ERS4773695 (SAMEA7005865) |
| AT-FI-F-SM-237 | Fish and fishery products            | fish - smoked salmon                                                       | AT | 2018 | 121 | Felix et al. 2020 | False | 94,21 | 3063549 | 18 | 3063549 | 3069890 | ERS4773696 (SAMEA7005866) |
| AT-FI-F-SM-241 | Fish and fishery products            | fish - smoked salmon trout                                                 | AT | 2019 | 121 | Felix et al. 2020 | False | 93,44 | 3069267 | 15 | 3069267 | 3101314 | ERS4773699 (SAMEA7005869) |
| AT-VE-M-SA-268 | Fruit, vegetables, cereals and herbs | mixed food RTE - delicatessen salad                                        | AT | 2017 | 121 | Felix et al. 2020 | False | 94,21 | 3034526 | 14 | 3034526 | 3101600 | ERS4773725 (SAMEA7005895) |

|                    |                                      |                                     |    |      |     |                   |       |       |         |    |         |         |                           |
|--------------------|--------------------------------------|-------------------------------------|----|------|-----|-------------------|-------|-------|---------|----|---------|---------|---------------------------|
| else               | Fruit, vegetables, cereals and herbs | salad RTE - salad                   | AT | 2019 | 236 | Felix et al. 2020 | false | 93,36 | 2984196 | 11 | 2984196 | 3029541 | ERS4773732 (SAMEA7005902) |
| B7200-O2-LmUB3PA   | Fish and fishery products            | smoked salmon                       | FR | 1999 | 121 | palma et al. 2020 | False | 95,44 | 3064267 | 4  | 3064267 | 3125948 | ERS3013737 (SAMEA5206265) |
| B7202-O1-LmUB3PA   | Fish and fishery products            | smoked salmon                       | FR | 1999 | 121 | palma et al. 2020 | False | 95,49 | 2961318 | 3  | 2961318 | 3022872 | ERS3013739 (SAMEA5206267) |
| BE-BOV-SK-H-71     | Farm animals                         | Hide                                | BE | 2018 | 121 | Felix et al. 2020 | False | 94,78 | 2937515 | 4  | 2937515 | 2938322 | ERS4773805 (SAMEA7005975) |
| C154-O1-LmUB3PA    | Processing environment               | #N/A                                | FR | 2000 | 121 | palma et al. 2020 | False | 95,63 | 2959281 | 5  | 2959281 | 3021954 | ERS3013745 (SAMEA5206273) |
| C5086-T1-LmUB3PA   | Processing environment               | #N/A                                | FR | 2000 | 121 | palma et al. 2020 | False | 95,52 | 2959290 | 4  | 2959290 | 3021424 | ERS3013750 (SAMEA5206278) |
| C5125-O-LmUB3PA    | Fish and fishery products            | smoked salmon                       | FR | 2000 | 121 | palma et al. 2020 | False | 95,61 | 2960542 | 2  | 2960542 | 3021652 | ERS3013751 (SAMEA5206279) |
| C5128-P-LmUB3PA    | Fish and fishery products            | smoked salmon                       | FR | 2000 | 121 | palma et al. 2020 | False | 95,5  | 3001392 | 3  | 3001392 | 3062798 | ERS3013753 (SAMEA5206281) |
| C5134-BPL1-LmUB3PA | Fish and fishery products            | smoked salmon                       | FR | 2000 | 121 | palma et al. 2020 | False | 95,53 | 2959442 | 3  | 2959442 | 3020996 | ERS3013754 (SAMEA5206282) |
| C5205-BPL1-LmUB3PA | Fish and fishery products            | smoked salmon                       | FR | 2000 | 121 | palma et al. 2020 | False | 95,58 | 3062929 | 4  | 3062929 | 3124728 | ERS3013756 (SAMEA5206284) |
| CA2815-P-LmUB3PA   | Fish and fishery products            | smoked salmon                       | FR | 2000 | 121 | palma et al. 2020 | False | 95,53 | 2961944 | 10 | 2961944 | 3025981 | ERS3013761 (SAMEA5206289) |
| CS310-S1-LmUB3PA   | Processing environment               | #N/A                                | FR | 2000 | 121 | palma et al. 2020 | False | 95,45 | 2960661 | 3  | 2960661 | 2961258 | ERS3013782 (SAMEA5206310) |
| CS461-S1-LmUB3PA   | Processing environment               | #N/A                                | FR | 2000 | 121 | palma et al. 2020 | False | 95,47 | 3060581 | 3  | 3060581 | 3061605 | ERS3013786 (SAMEA5206314) |
| CZ-DA-U-UN-75      | Milk and milk products               | dairy product                       | CZ | 2016 | 121 | Felix et al. 2020 | False | 94,13 | 3068050 | 19 | 3068050 | 3073821 | ERS4773861 (SAMEA7006031) |
| CZ-FAR-CF-54       | Soil & farm environment              | strawberries from the field - field | CZ | 2014 | 121 | Felix et al. 2020 | False | 94,61 | 2929874 | 18 | 2929874 | 2996777 | ERS4773867 (SAMEA7006037) |

|                |                                      |                                                               |    |      |     |                   |       |       |         |    |         |         |                           |
|----------------|--------------------------------------|---------------------------------------------------------------|----|------|-----|-------------------|-------|-------|---------|----|---------|---------|---------------------------|
| CZ-FI-F-UN-85  | Fish and fishery products            | fish product                                                  | CZ | 2016 | 121 | Felix et al. 2020 | False | 95,11 | 3097224 | 2  | 3097224 | 3097599 | ERS4773873 (SAMEA7006043) |
| CZ-FI-F-UN-86  | Fish and fishery products            | fish product                                                  | CZ | 2007 | 741 | Felix et al. 2020 | False | 94,9  | 3039668 | 2  | 3039668 | 3064229 | ERS4773874 (SAMEA7006044) |
| CZ-HU-CP-I-185 | human                                | 0                                                             | CZ | 2014 | 121 | this study        | False | 95,5  | 3059380 | 1  | 3059380 | 3059380 | SAMEA7290450              |
| CZ-HU-CP-I-231 | human                                | 0                                                             | CZ | 2014 | 121 | this study        | False | 95,52 | 3057159 | 4  | 3057159 | 3063444 | SAMEA7290451              |
| CZ-HU-CP-I-271 | human                                | 0                                                             | CZ | 2016 | 121 | this study        | False | 95,58 | 3060871 | 1  | 3060871 | 3060871 | SAMEA7290452              |
| CZ-ME-U-UN-119 | Meat and meat products               | RTE meat                                                      | CZ | 2016 | 121 | Felix et al. 2020 | False | 94,18 | 2875369 | 3  | 2875369 | 2936218 | ERS4773892 (SAMEA7006062) |
| CZ-ME-U-UN-131 | Meat and meat products               | RTE meat                                                      | CZ | 2016 | 121 | Felix et al. 2020 | False | 95,04 | 3032488 | 7  | 3032488 | 3104983 | ERS4773903 (SAMEA7006073) |
| CZ-ME-U-UN-139 | Meat and meat products               | RTE meat                                                      | CZ | 2016 | 121 | Felix et al. 2020 | False | 94,6  | 2949666 | 2  | 2949666 | 3010666 | ERS4773906 (SAMEA7006076) |
| CZ-ME-U-UN-149 | Meat and meat products               | RTE meat                                                      | CZ | 2019 | 121 | Felix et al. 2020 | False | 94,21 | 2881883 | 3  | 2881883 | 2937666 | ERS4773916 (SAMEA7006086) |
| CZ-ME-U-UN-153 | Meat and meat products               | RTE meat                                                      | CZ | 2014 | 121 | Felix et al. 2020 | False | 95,14 | 3003676 | 4  | 3003676 | 3065580 | ERS4773920 (SAMEA7006090) |
| CZ-VE-F-102    | Fruit, vegetables, cereals and herbs | fruit - fresh                                                 | CZ | 2014 | 121 | Felix et al. 2020 | False | 94,43 | 2932806 | 3  | 2932806 | 2994003 | ERS4773961 (SAMEA7006131) |
| DE-WBO-UN-34   | Wild animals                         | wild boar                                                     | DE | 2012 | 121 | Felix et al. 2020 | False | 94,52 | 2916667 | 9  | 2916667 | 2982509 | ERS4774021 (SAMEA7006192) |
| DN-CO-M-50     | Composite dishes                     | Composite dish - Tzatziki (greek style, cucumber and yoghurt) | DN | 2018 | 121 | Felix et al. 2020 | False | 94,27 | 3058579 | 36 | 3058579 | 3075970 | ERS4774023 (SAMEA7006194) |
| DN-CO-M-54     | Composite dishes                     | Composite dish - Mustard mayonnaise                           | DN | 2014 | 236 | Felix et al. 2020 | False | 95,38 | 3007951 | 2  | 3007951 | 3069147 | ERS4774025 (SAMEA7006196) |
| DN-CO-M-67     | Composite dishes                     | Composite dish - Chicken salad                                | DN | 2015 | 121 | Felix et al. 2020 | False | 95,3  | 3066642 | 22 | 3066642 | 3137400 | ERS4774029 (SAMEA7006200) |
| DN-CO-M-77     | Composite dishes                     | Composite dish - Sandwich with salmon/green salad             | DN | 2016 | 121 | Felix et al. 2020 | False | 95,61 | 3095118 | 32 | 3095118 | 3108757 | ERS4774034 (SAMEA7006205) |
| DN-FI-F-FF-70  | Fish and fishery products            | RTE fish - Salmon                                             | DN | 2015 | 121 | Felix et al. 2020 | False | 95,33 | 3035574 | 3  | 3035574 | 3097054 | ERS4774037 (SAMEA7006208) |

|                 |                           |                                                                 |    |      |     |                   |       |       |         |     |         |         |                           |
|-----------------|---------------------------|-----------------------------------------------------------------|----|------|-----|-------------------|-------|-------|---------|-----|---------|---------|---------------------------|
| DN-FI-F-SM-43   | Fish and fishery products | RTE fish - Smoked salmon                                        | DN | 2017 | 121 | Felix et al. 2020 | False | 94,29 | 2999991 | 53  | 2999991 | 3083318 | ERS4774041 (SAMEA7006212) |
| DN-FI-F-SM-46   | Fish and fishery products | RTE fish - Smoked salmon                                        | DN | 2017 | 121 | Felix et al. 2020 | False | 95,09 | 3098680 | 2   | 3098680 | 3098931 | ERS4774044 (SAMEA7006215) |
| DN-FI-F-SM-58   | Fish and fishery products | RTE fish - Smoked halibut                                       | DN | 2014 | 121 | Felix et al. 2020 | False | 95,43 | 3099193 | 2   | 3099193 | 3099442 | ERS4774046 (SAMEA7006217) |
| DN-FI-F-SM-71   | Fish and fishery products | RTE fish - Smoked salmon                                        | DN | 2015 | 121 | Felix et al. 2020 | False | 95,41 | 3226793 | 9   | 3226793 | 3229685 | ERS4774049 (SAMEA7006220) |
| DN-ME-B-PM-78   | Meat and meat products    | RTE meat - Roasted beef, sliced                                 | DN | 2017 | 121 | Felix et al. 2020 | False | 95,04 | 3101051 | 29  | 3101051 | 3113590 | ERS4774056 (SAMEA7006227) |
| DN-ME-P-DE-32   | Meat and meat products    | RTE meat - Pork salami                                          | DN | 2015 | 236 | Felix et al. 2020 | False | 95,26 | 3027733 | 2   | 3027733 | 3028185 | ERS4774061 (SAMEA7006232) |
| DN-ME-P-PM-10   | Meat and meat products    | RTE meat - Rolled seasoned meat (pork), sliced                  | DN | 2017 | 121 | Felix et al. 2020 | False | 94,98 | 3097489 | 33  | 3097489 | 3111172 | ERS4774066 (SAMEA7006237) |
| DN-ME-P-PM-8    | Meat and meat products    | RTE meat - Rolled seasoned meat (pork), sliced                  | DN | 2017 | 121 | Felix et al. 2020 | False | 94,45 | 3097910 | 94  | 3097910 | 3138545 | ERS4774073 (SAMEA7006244) |
| DN-ME-P-U-31    | Meat and meat products    | RTE meat - Chicken                                              | DN | 2015 | 121 | Felix et al. 2020 | False | 95,31 | 3038356 | 11  | 3038356 | 3102179 | ERS4774075 (SAMEA7006246) |
| DN-ME-UN-DE-25  | Meat and meat products    | RTE meat - Meatballs                                            | DN | 2015 | 121 | Felix et al. 2020 | False | 95,54 | 3037281 | 8   | 3037281 | 3101950 | ERS4774076 (SAMEA7006247) |
| FI-PIG-CP-U-141 | Farm animals              | Pig - Tonsil                                                    | FI | 2003 | 121 | Felix et al. 2020 | False | 94,94 | 2880714 | 3   | 2880714 | 2881382 | ERS4774280 (SAMEA7006451) |
| FR-CO-M-OT-599  | Composite dishes          | Plats cuisinés - nem chua BLA                                   | FR | 2017 | 121 | Felix et al. 2020 | False | 94,9  | 3025808 | 3   | 3025808 | 3032190 | ERS4774306 (SAMEA7006477) |
| FR-CO-M-OT-600  | Composite dishes          | Plats cuisinés - farce pour pâtes crues                         | FR | 2017 | 121 | Felix et al. 2020 | False | 94,07 | 2934175 | 179 | 2934175 | 3048364 | ERS4774307 (SAMEA7006478) |
| FR-CO-M-OT-604  | Composite dishes          | Plats cuisinés - nem chua BLA                                   | FR | 2017 | 121 | Felix et al. 2020 | False | 94,82 | 2963529 | 214 | 2963529 | 3091478 | #N/A                      |
| FR-CO-M-SA-708  | Composite dishes          | Plats cuisinés - salade composée poulet oeuf dur tomates salade | FR | 2011 | 121 | Henri et al. 2016 | False | 96,03 | 2997886 | 5   | 2997886 | 3059898 | ERS4774319 (SAMEA7006490) |
| FR-DA-U-CH-638  | Milk and milk products    | Lait et fromage - fromage non affiné au lait pasteurisé         | FR | 2017 | 121 | Felix et al. 2020 | False | 94,23 | 2932719 | 3   | 2932719 | 2994273 | ERS4774346 (SAMEA7006517) |
| FR-FI-F-FF-615  | Fish and fishery products | Poisson - dos de cabillaud                                      | FR | 2017 | 121 | Felix et al. 2020 | False | 95,2  | 3033852 | 3   | 3033852 | 3095542 | ERS4774396 (SAMEA7006567) |



|                |                           |                                      |    |      |     |                    |       |       |         |    |         |         |                           |
|----------------|---------------------------|--------------------------------------|----|------|-----|--------------------|-------|-------|---------|----|---------|---------|---------------------------|
| FR-FI-F-SM-611 | Fish and fishery products | Poisson - filets saumon fumé à cuire | FR | 2017 | 121 | Felix et al. 2020  | False | 95,16 | 3094292 | 14 | 3094292 | 3097567 | ERS4774422 (SAMEA7006593) |
| FR-FI-F-SM-621 | Fish and fishery products | Poisson - saumon fumé                | FR | 2017 | 121 | Felix et al. 2020  | False | 95,09 | 3027759 | 5  | 3027759 | 3095508 | ERS4774423 (SAMEA7006594) |
| FR-FI-F-SM-627 | Fish and fishery products | Poisson - saumon fumé                | FR | 2017 | 121 | Felix et al. 2020  | False | 94,97 | 3150408 | 34 | 3150408 | 3228661 | ERS4774424 (SAMEA7006595) |
| FR-FI-F-SM-642 | Fish and fishery products | Poisson - saumon fumé ecosse         | FR | 2017 | 121 | Felix et al. 2020  | False | 95,22 | 3026808 | 7  | 3026808 | 3095430 | ERS4774425 (SAMEA7006596) |
| FR-FI-S-OT-629 | Fish and fishery products | Crustacés - cocktail fruits de mer   | FR | 2017 | 121 | Felix et al. 2020  | False | 95,09 | 3105919 | 9  | 3105919 | 3111073 | ERS4774434 (SAMEA7006605) |
| FR-FI-U-UN-440 | Fish and fishery products | Fish and fishery products            | FR | 2008 | 121 | Fritch et al. 2019 | False | 95,4  | 3044157 | 5  | 3044157 | 3111502 | ERR2727616 (SAMEA4816501) |
| FR-FI-U-UN-447 | Fish and fishery products | Fish and fishery products            | FR | 2010 | 121 | Fritch et al. 2019 | False | 95,11 | 2982985 | 3  | 2982985 | 2983553 | ERR2727620 (SAMEA4816505) |
| FR-FI-U-UN-450 | Fish and fishery products | Fish and fishery products            | FR | 2010 | 121 | Fritch et al. 2019 | False | 95,43 | 2993100 | 4  | 2993100 | 3060115 | ERR2727621 (SAMEA4816507) |
| FR-FI-U-UN-462 | Fish and fishery products | Fish and fishery products            | FR | 2011 | 121 | Fritch et al. 2019 | False | 95,45 | 3111620 | 9  | 3111620 | 3117270 | ERR2728039 (SAMEA4819877) |
| FR-FI-U-UN-476 | Fish and fishery products | Fish and fishery products            | FR | 2011 | 121 | Typelipo           | False | 95,73 | 3090381 | 10 | 3090381 | 3094922 | ERS4774437 (SAMEA7006608) |
| FR-ME-A-DE-617 | Meat and meat products    | Charcuterie - foie gras              | FR | 2017 | 121 | Felix et al. 2020  | False | 94,55 | 2952366 | 5  | 2952366 | 3020082 | ERS4774443 (SAMEA7006614) |
| FR-ME-A-DE-672 | Meat and meat products    | Volaille - foie de volaille          | FR | 2017 | 121 | Felix et al. 2020  | False | 95,01 | 3059959 | 6  | 3059959 | 3063831 | ERS4774447 (SAMEA7006618) |
| FR-ME-B-DE-648 | Meat and meat products    | Charcuterie - merguez de bœuf        | FR | 2017 | 121 | Felix et al. 2020  | False | 94,9  | 3005254 | 4  | 3005254 | 3067663 | ERS4774453 (SAMEA7006624) |
| FR-ME-B-PM-614 | Meat and meat products    | Bovin - steack haché                 | FR | 2017 | 121 | Felix et al. 2020  | False | 94,54 | 3013754 | 4  | 3013754 | 3076071 | ERS4774456 (SAMEA7006627) |

|                |                                      |                                               |    |      |     |                   |       |       |         |    |         |         |                           |
|----------------|--------------------------------------|-----------------------------------------------|----|------|-----|-------------------|-------|-------|---------|----|---------|---------|---------------------------|
| FR-ME-P-PM-658 | Meat and meat products               | Charcuterie - échine de porc                  | FR | 2017 | 121 | Felix et al. 2020 | False | 95,05 | 3026217 | 5  | 3026217 | 3093326 | ERS4774488 (SAMEA7006659) |
| FR-ME-U-UN-448 | Meat and meat products               | Meat and meat products                        | FR | 2010 | 121 | Henri et al. 2016 | False | 94,87 | 3020961 | 31 | 3020961 | 3094999 | ERR1738661 (SAMEA4475883) |
| FR-ME-U-UN-452 | Meat and meat products               | Meat and meat products                        | FR | 2011 | 121 | Henri et al. 2016 | False | 95,5  | 2960977 | 16 | 2960977 | 3025981 | ERR1738769 (SAMEA4475892) |
| FR-ME-U-UN-454 | Meat and meat products               | Meat and meat products                        | FR | 2011 | 121 | Henri et al. 2016 | False | 96,11 | 2999948 | 8  | 2999948 | 3062681 | ERR1738776 (SAMEA4475899) |
| FR-ME-U-UN-467 | Meat and meat products               | Meat and meat products                        | FR | 2012 | 121 | Henri et al. 2016 | False | 95,36 | 2993813 | 3  | 2993813 | 3055047 | ERR1738800 (SAMEA4475923) |
| FR-PE-FI-M-654 | Composite dishes                     | Poisson - lingette: cuve tarama               | FR | 2017 | 121 | Felix et al. 2020 | False | 94,93 | 3024428 | 2  | 3024428 | 3025008 | ERS4774522 (SAMEA7006693) |
| FR-PE-ME-S-620 | Meat and meat products               | Volaille - surface                            | FR | 2017 | 121 | Felix et al. 2020 | False | 95,28 | 3033673 | 2  | 3033673 | 3094783 | ERS4774523 (SAMEA7006694) |
| FR-VE-F-OT-594 | Fruit, vegetables, cereals and herbs | Plats cuisinés - purée de céleri              | FR | 2017 | 121 | Felix et al. 2020 | False | 94,9  | 3083076 | 4  | 3083076 | 3089547 | ERS4774528 (SAMEA7006699) |
| FR-VE-U-UN-436 | Fruit, vegetables, cereals and herbs | Fruit, vegetables, cereals and herbs          | FR | 2008 | 121 | Henri et al. 2016 | False | 96,03 | 3670322 | 15 | 3670322 | 3674491 | ERS4774533 (SAMEA7006704) |
| FR-VE-U-UN-469 | Fruit, vegetables, cereals and herbs | Fruit, vegetables, cereals and herbs          | FR | 2012 | 121 | Henri et al. 2016 | False | 95,83 | 3122284 | 7  | 3122284 | 3184895 | ERR1738796 (SAMEA4475919) |
| FR-VE-V-FZ-711 | Fruit, vegetables, cereals and herbs | fruits rougessurgelé - fruits rouges surgelés | FR | 2011 | 121 | Henri et al. 2016 | False | 96,24 | 3004765 | 8  | 3004765 | 3006535 | ERS4774540 (SAMEA7006711) |
| FR-VE-V-OT-601 | Fruit, vegetables, cereals and herbs | Plats cuisinés - crème de brocolis            | FR | 2017 | 121 | Felix et al. 2020 | False | 94,9  | 3092697 | 81 | 3092697 | 3115081 | ERS4774545 (SAMEA7006716) |
| FR-VE-V-RA-700 | Fruit, vegetables, cereals and herbs | légumes - surface                             | FR | 2012 | 121 | Henri et al. 2016 | False | 95,42 | 3012491 | 12 | 3012491 | 3077963 | ERS4774557 (SAMEA7006728) |

|                |                                      |                                                  |    |      |     |                    |       |       |         |    |         |         |                           |
|----------------|--------------------------------------|--------------------------------------------------|----|------|-----|--------------------|-------|-------|---------|----|---------|---------|---------------------------|
| FR-VE-V-RA-701 | Fruit, vegetables, cereals and herbs | légumes - surface                                | FR | 2012 | 121 | Henri et al. 2016  | False | 95,36 | 2990476 | 9  | 2990476 | 3053560 | ERS4774558 (SAMEA7006729) |
| FR-VE-V-RA-709 | Fruit, vegetables, cereals and herbs | Plats cuisinés - carottesrâpéessaladevinaigrette | FR | 2011 | 121 | Henri et al. 2016  | False | 95,49 | 2936682 | 27 | 2936682 | 3004385 | ERS4774560 (SAMEA7006731) |
| FR-VE-V-RA-725 | Fruit, vegetables, cereals and herbs | légumes - Tomates crues                          | FR | 2006 | 121 | Henri et al. 2016  | False | 95,77 | 3121687 | 5  | 3121687 | 3122718 | ERS4774564 (SAMEA7006735) |
| FR-VE-V-SA-723 | Fruit, vegetables, cereals and herbs | légumes - poireaux salade                        | FR | 2008 | 121 | Henri et al. 2016  | False | 96,08 | 3061892 | 16 | 3061892 | 3126674 | ERS4774567 (SAMEA7006738) |
| FR-VE-V-SA-724 | Fruit, vegetables, cereals and herbs | légumes - endives en salade                      | FR | 2008 | 121 | Henri et al. 2016  | False | 95,85 | 2998290 | 3  | 2998290 | 3059891 | ERS4774568 (SAMEA7006739) |
| FSL F3-0293    | Soil & farm environment              | mangeoir                                         | US | 2003 | 121 | Fugett et al. 2007 | False | 95,26 | 2916016 | 3  | 2916016 | 2916496 | SRR12518428               |
| FSL F3-146     | Soil & farm environment              | water (farm)                                     | US | 2003 | 121 | Fugett et al. 2007 | False | 94,5  | 2878778 | 3  | 2878778 | 2884439 | SRR12164826               |
| FSL F3-194     | Farm animals                         | bovine (feces)                                   | US | 2003 | 121 | Fugett et al. 2007 | False | 94,57 | 2878774 | 5  | 2878774 | 2884790 | SRR12518435               |
| HR-BOV-CP-I-46 | Farm animals                         | Abortion Cattle                                  | HR | 2016 | 121 | Felix et al. 2020  | False | 95,57 | 3007019 | 4  | 3007019 | 3068179 | ERS4774577 (SAMEA7006748) |
| HR-BOV-CP-I-47 | Farm animals                         | Abortion Cattle                                  | HR | 2016 | 121 | Felix et al. 2020  | False | 95,57 | 3067108 | 2  | 3067108 | 3067599 | ERS4774578 (SAMEA7006749) |
| IT-CO-U-UN-146 | Composite dishes                     | composite dishes - - composite dishes            | IT | 2016 | 121 | Felix et al. 2020  | false | 95,01 | 3077851 | 32 | 3077851 | 3146450 | ERS4774598 (SAMEA7006769) |
| IT-FI-F-UN-223 | Fish and fishery products            | SALMON - - Fish and fishery products             | IT | 2015 | 121 | Felix et al. 2020  | False | 94,49 | 3053432 | 1  | 3053432 | 3053432 | ERS4774645 (SAMEA7006816) |
| IT-FI-F-UN-234 | Fish and fishery products            | SALMON - - Fish and fishery products             | IT | 2014 | 121 | Felix et al. 2020  | False | 94,79 | 3123484 | 5  | 3123484 | 3126846 | ERS4774653 (SAMEA7006824) |

|                |                           |                                                    |    |      |     |                   |       |       |         |    |         |         |                           |
|----------------|---------------------------|----------------------------------------------------|----|------|-----|-------------------|-------|-------|---------|----|---------|---------|---------------------------|
| IT-FI-F-UN-238 | Fish and fishery products | TUNA - - Fish and fishery products                 | IT | 2015 | 121 | Felix et al. 2020 | False | 94,92 | 3061732 | 2  | 3061732 | 3122829 | ERS4774657 (SAMEA7006828) |
| IT-FI-F-UN-240 | Fish and fishery products | SALMON - - Fish and fishery products               | IT | 2014 | 121 | Felix et al. 2020 | False | 95,18 | 3032414 | 60 | 3032414 | 3107956 | ERS4774658 (SAMEA7006829) |
| IT-FI-F-UN-241 | Fish and fishery products | SALMON - - Fish and fishery products               | IT | 2014 | 121 | Felix et al. 2020 | False | 94,82 | 3070193 | 30 | 3070193 | 3102089 | ERS4774659 (SAMEA7006830) |
| IT-FI-F-UN-251 | Fish and fishery products | SALMON (Salmo salar) - - Fish and fishery products | IT | 2019 | 121 | Felix et al. 2020 | False | 95,5  | 3029489 | 3  | 3029489 | 3090817 | ERS4774666 (SAMEA7006837) |
| IT-FI-S-UN-239 | Fish and fishery products | MOLLUSCS - - Fish and fishery products             | IT | 2014 | 121 | Felix et al. 2020 | False | 94,92 | 3061732 | 2  | 3061732 | 3122829 | ERS4774669 (SAMEA7006840) |
| IT-ME-B-RA-279 | Meat and meat products    | Raw meat - Bovine - Meat and meat products         | IT | 2014 | 121 | Felix et al. 2020 | False | 95,12 | 3065303 | 2  | 3065303 | 3065595 | ERS4774688 (SAMEA7006859) |
| IT-ME-P-DE-265 | Meat and meat products    | SOPPRESSATA - Pork - Meat and meat products        | IT | 2016 | 121 | Felix et al. 2020 | False | 95,22 | 3057361 | 4  | 3057361 | 3058547 | ERS4774699 (SAMEA7006870) |
| IT-ME-P-DE-271 | Meat and meat products    | MORTADELLA - Pork - Meat and meat products         | IT | 2015 | 121 | Felix et al. 2020 | False | 94,71 | 2969961 | 2  | 2969961 | 2970170 | ERS4774704 (SAMEA7006875) |
| IT-ME-P-DE-288 | Meat and meat products    | salami - Pork - Meat and meat products             | IT | 2016 | 121 | Felix et al. 2020 | False | 94,6  | 3062662 | 27 | 3062662 | 3069059 | ERS4774713 (SAMEA7006884) |
| IT-ME-P-DE-290 | Meat and meat products    | Sausage - Pork - Meat and meat products            | IT | 2016 | 121 | Felix et al. 2020 | False | 94,69 | 3034449 | 3  | 3034449 | 3095786 | ERS4774715 (SAMEA7006886) |
| IT-NAT-SO-53   | Soil & farm environment   | - Environment                                      | IT | 2018 | 121 | Felix et al. 2020 | False | 95,04 | 3030428 | 31 | 3030428 | 3099846 | ERS4774730 (SAMEA7006901) |
| IT-OTH-CP-36   | Wild animals              | Dolphin - Brain                                    | IT | 2017 | 121 | Felix et al. 2020 | False | 95,26 | 2967551 | 11 | 2967551 | 3030518 | ERS4775211 (SAMEA7007383) |
| IT-PE-ME-U-286 | Processing environment    | Swab (SPONGE BAGS) - - Meat and meat products      | IT | 2016 | 121 | Felix et al. 2020 | False | 95,53 | 3096852 | 5  | 3096852 | 3097986 | ERS4774777 (SAMEA7006949) |
| K7970-LmUB3PA  | Fish and fishery products | shrimp                                             | FR | 2008 | 121 | palma et al. 2020 | False | 94,71 | 2933729 | 4  | 2933729 | 2995314 | ERS3013810 (SAMEA5206338) |
| K8125-LmUB3PA  | Processing environment    | #N/A                                               | FR | 2008 | 121 | palma et al. 2020 | False | 94,74 | 2994343 | 3  | 2994343 | 2995018 | ERS3013811 (SAMEA5206339) |
| K8510-LmUB3PA  | Fish and fishery products | shrimp                                             | FR | 2008 | 121 | palma et al. 2020 | False | 94,71 | 2994115 | 2  | 2994115 | 2994559 | ERS3013812 (SAMEA5206340) |

|               |                           |             |    |      |     |                   |       |       |         |   |         |         |                           |
|---------------|---------------------------|-------------|----|------|-----|-------------------|-------|-------|---------|---|---------|---------|---------------------------|
| K8642-LmUB3PA | Processing environment    | #N/A        | FR | 2008 | 121 | palma et al. 2020 | False | 94,7  | 2994253 | 2 | 2994253 | 2994697 | ERS3013813 (SAMEA5206341) |
| L1017-LmUB3PA | Fish and fishery products | shrimp      | FR | 2009 | 121 | palma et al. 2020 | False | 94,75 | 2993897 | 2 | 2993897 | 2994341 | ERS3013814 (SAMEA5206342) |
| L7561-LmUB3PA | Processing environment    | #N/A        | FR | 2009 | 121 | palma et al. 2020 | False | 94,74 | 3036044 | 4 | 3036044 | 3097998 | ERS3013815 (SAMEA5206343) |
| L-893-LmUB3PA | Processing environment    | #N/A        | FR | 2009 | 121 | palma et al. 2020 | False | 94,73 | 2932621 | 3 | 2932621 | 2933310 | ERS3013816 (SAMEA5206344) |
| L9562-LmUB3PA | Fish and fishery products | shrimp      | FR | 2009 | 121 | palma et al. 2020 | False | 94,71 | 2994018 | 3 | 2994018 | 2994707 | ERS3013817 (SAMEA5206345) |
| M129-LmUB3PA  | Fish and fishery products | Shrimp      | FR | 2010 | 121 | palma et al. 2020 | False | 94,75 | 2993655 | 4 | 2993655 | 2994437 | ERS3013818 (SAMEA5206346) |
| M5372-LmUB3PA | Fish and fishery products | Shrimp      | FR | 2010 | 121 | palma et al. 2020 | False | 94,72 | 2932731 | 4 | 2932731 | 2994413 | ERS3013819 (SAMEA5206347) |
| M5596-LmUB3PA | Fish and fishery products | Environment | FR | 2010 | 121 | palma et al. 2020 | False | 94,64 | 2995261 | 4 | 2995261 | 2996512 | ERS3013820 (SAMEA5206348) |
| M896-LmUB3PA  | Fish and fishery products | Environment | FR | 2010 | 121 | palma et al. 2020 | False | 94,75 | 2933361 | 3 | 2933361 | 2994716 | ERS3013821 (SAMEA5206349) |
| N44-LmUB3PA   | Fish and fishery products | Shrimp      | FR | 2011 | 121 | palma et al. 2020 | False | 94,72 | 2934840 | 4 | 2934840 | 2996504 | ERS3013822 (SAMEA5206350) |
| N7764-LmUB3PA | Fish and fishery products | Environment | FR | 2011 | 121 | palma et al. 2020 | False | 94,71 | 2994020 | 2 | 2994020 | 2994464 | ERS3013823 (SAMEA5206351) |
| N8001-LmUB3PA | Fish and fishery products | Shrimp      | FR | 2011 | 121 | palma et al. 2020 | False | 94,7  | 2995102 | 2 | 2995102 | 2995386 | ERS3013824 (SAMEA5206352) |
| N8038-LmUB3PA | Fish and fishery products | Environment | FR | 2011 | 121 | palma et al. 2020 | False | 94,72 | 2994417 | 6 | 2994417 | 2996281 | ERS3013825 (SAMEA5206353) |
| NL-AVI-UN-36  | Farm animals              | chicken     | NL | 2017 | 121 | Felix et al. 2020 | False | 95,77 | 3130729 | 1 | 3130729 | 3130729 | ERS4774816 (SAMEA7006988) |

|              |                           |                                           |    |      |     |                     |       |       |         |    |         |         |                              |
|--------------|---------------------------|-------------------------------------------|----|------|-----|---------------------|-------|-------|---------|----|---------|---------|------------------------------|
| NL-AVI-UN-37 | Farm animals              | chicken                                   | NL | 2018 | 121 | Felix et al. 2020   | False | 95,77 | 3052579 | 4  | 3052579 | 3114485 | ERS4774817<br>(SAMEA7006989) |
| O116-LmUB3PA | Fish and fishery products | Environment                               | FR | 2012 | 121 | palma et al. 2020   | False | 94,7  | 2994236 | 4  | 2994236 | 2995524 | ERS3013826<br>(SAMEA5206354) |
| O228-LmUB3PA | Fish and fishery products | Shrimp                                    | FR | 2012 | 121 | palma et al. 2020   | False | 94,75 | 2994130 | 4  | 2994130 | 2995248 | ERS3013827<br>(SAMEA5206355) |
| PL-URB-PA-5  | Soil & farm environment   | Caspian town Park - soil                  | PL | 2015 | 593 | Felix et al. 2020   | False | 95,23 | 2980157 | 18 | 2980157 | 2985396 | ERS4774935<br>(SAMEA7007107) |
| RL15000006   | Fish and fishery products | Fish Smoked (Salmon)                      | FR | 2010 | 121 | Painset et al. 2019 | False | 95,74 | 2959786 | 6  | 2959786 | 3021593 | SRR7440649                   |
| RL15000009   | Fish and fishery products | Fish Smoked (Salmon)                      | FR | 2011 | 121 | Painset et al. 2019 | False | 95,88 | 3004106 | 4  | 3004106 | 3066238 | SRR7440652                   |
| RL15000010   | Meat and meat products    | Mixed sources Deli products - Pate Cooked | FR | 2011 | 121 | Painset et al. 2019 | False | 94,62 | 3040729 | 16 | 3040729 | 3077703 | SRR7440645                   |
| RL15000011   | Fish and fishery products | Fish (Salmon)                             | FR | 2011 | 121 | Painset et al. 2019 | False | 94,18 | 3035461 | 47 | 3035461 | 3110544 | SRR7440646                   |
| RL15000014   | Fish and fishery products | Fish Smoked (Salmon)                      | FR | 2011 | 121 | Painset et al. 2019 | False | 95,84 | 3032955 | 5  | 3032955 | 3096379 | SRR7440654                   |
| RL15000015   | Fish and fishery products | Fish Wild fish Smoked (Herring, kipper)   | FR | 2011 | 121 | Painset et al. 2019 | False | 94,81 | 3047513 | 14 | 3047513 | 3082196 | SRR7440655                   |
| RL15000018   | Fish and fishery products | Fish Wild fish Filet (Herring, kipper)    | FR | 2011 | 121 | Painset et al. 2019 | False | 95,82 | 2993092 | 7  | 2993092 | 3055567 | SRR7441209                   |
| RL15000019   | Fish and fishery products | Fish Smoked (Salmon)                      | FR | 2011 | 121 | Painset et al. 2019 | False | 94,53 | 3006710 | 32 | 3006710 | 3078631 | SRR7441208                   |
| RL15000023   | Fish and fishery products | Fish Smoked (Salmon)                      | FR | 2011 | 121 | Painset et al. 2019 | False | 96,04 | 3031967 | 5  | 3031967 | 3095550 | SRR7441212                   |
| RL15000026   | Meat and meat products    | Unspecified Deli products - Pate          | LV | 2011 | 121 | Painset et al. 2019 | False | 94,91 | 2930863 | 3  | 2930863 | 2991884 | SRR7440949                   |

|            |                           |                                       |    |      |     |                     |       |       |         |    |         |         |            |
|------------|---------------------------|---------------------------------------|----|------|-----|---------------------|-------|-------|---------|----|---------|---------|------------|
| RL15000031 | Fish and fishery products | Fish Cold smoked                      | BG | 2011 | 121 | Painset et al. 2019 | false | 95,18 | 3018920 | 5  | 3018920 | 3021619 | SRR7441023 |
| RL15000038 | Fish and fishery products | Fish Gravad/slightly salted           | BG | 2011 | 121 | Painset et al. 2019 | False | 95,08 | 2955245 | 9  | 2955245 | 3021360 | SRR7440588 |
| RL15000042 | Fish and fishery products | Fish Cold smoked                      | BG | 2011 | 121 | Painset et al. 2019 | false | 93,86 | 2936279 | 15 | 2936279 | 2966530 | SRR7440584 |
| RL15000051 | Fish and fishery products | Fish Wild fish Cold smoked            | HU | 2011 | 121 | Painset et al. 2019 | False | 94,64 | 3035207 | 3  | 3035207 | 3060080 | SRR7440829 |
| RL15000055 | Fish and fishery products | Fish Wild fish Warm smoked            | HU | 2011 | 121 | Painset et al. 2019 | False | 93,49 | 3021047 | 18 | 3021047 | 3054649 | SRR7440817 |
| RL15000060 | Fish and fishery products | Fish Wild fish Gravad/slightly salted | LT | 2011 | 121 | Painset et al. 2019 | true  | 95,85 | 3031933 | 10 | 3031933 | 3096792 | SRR7440906 |
| RL15000061 | Fish and fishery products | Fish Smoked                           | UK | 2010 | 121 | Painset et al. 2019 | false | 95,26 | 3025936 | 8  | 3025936 | 3095096 | SRR7440905 |
| RL15000062 | Fish and fishery products | Fish Smoked                           | UK | 2010 | 121 | Painset et al. 2019 | False | 95,19 | 3033296 | 5  | 3033296 | 3095348 | SRR7440904 |
| RL15000063 | Fish and fishery products | Fish Gravad/slightly salted           | UK | 2011 | 121 | Painset et al. 2019 | False | 95,42 | 3002088 | 6  | 3002088 | 3063711 | SRR7440903 |
| RL15000085 | Fish and fishery products | Fish Smoked                           | PL | 2011 | 121 | Painset et al. 2019 | False | 95,79 | 2957298 | 5  | 2957298 | 3019090 | SRR7440684 |
| RL15000091 | Fish and fishery products | Fish Cold smoked                      | PL | 2011 | 121 | Painset et al. 2019 | False | 94,63 | 2914582 | 10 | 2914582 | 2985512 | SRR7441147 |
| RL15000093 | Fish and fishery products | Fish Cold smoked                      | PL | 2011 | 121 | Painset et al. 2019 | False | 95,03 | 3016536 | 15 | 3016536 | 3052664 | SRR7441149 |
| RL15000098 | Fish and fishery products | Fish Warm smoked                      | PL | 2011 | 121 | Painset et al. 2019 | False | 94,73 | 3040154 | 26 | 3040154 | 3083510 | SRR7440709 |

|            |                           |                                           |    |      |     |                     |       |       |         |     |         |         |            |
|------------|---------------------------|-------------------------------------------|----|------|-----|---------------------|-------|-------|---------|-----|---------|---------|------------|
| RL15000121 | Fish and fishery products | Fish Cold smoked                          | PL | 2011 | 121 | Painset et al. 2019 | False | 95,14 | 2995042 | 7   | 2995042 | 2998921 | SRR7440703 |
| RL15000128 | Fish and fishery products | Fish                                      | BE | 2011 | 121 | Painset et al. 2019 | False | 95,87 | 3032300 | 6   | 3032300 | 3096151 | SRR7440558 |
| RL15000129 | Fish and fishery products | Fish                                      | BE | 2011 | 121 | Painset et al. 2019 | False | 95,37 | 3031812 | 8   | 3031812 | 3095592 | SRR7440561 |
| RL15000130 | Fish and fishery products | Fish                                      | BE | 2011 | 121 | Painset et al. 2019 | false | 95,82 | 3000561 | 168 | 3000561 | 3111839 | SRR7440560 |
| RL15000134 | Fish and fishery products | Fish Cold smoked                          | NL | 2011 | 121 | Painset et al. 2019 | False | 95,88 | 3002061 | 8   | 3002061 | 3068143 | SRR7440564 |
| RL15000142 | Fish and fishery products | Fish Cold smoked                          | NL | 2011 | 121 | Painset et al. 2019 | False | 94,46 | 2913374 | 18  | 2913374 | 2947563 | SRR7441009 |
| RL15000145 | Fish and fishery products | Fish Smoked                               | NL | 2011 | 121 | Painset et al. 2019 | true  | 94,8  | 2995919 | 32  | 2995919 | 3066336 | SRR7440996 |
| RL15000148 | Fish and fishery products | Fish Wild fish Gravad/slightly salted     | NL | 2011 | 121 | Painset et al. 2019 | False | 95,59 | 3031703 | 4   | 3031703 | 3093005 | SRR7440843 |
| RL15000154 | Fish and fishery products | Fish Wild fish Smoked                     | DN | 2010 | 121 | Painset et al. 2019 | False | 94,72 | 3046946 | 19  | 3046946 | 3078057 | SRR7440845 |
| RL15000156 | Fish and fishery products | Fish Wild fish Smoked                     | DN | 2011 | 121 | Painset et al. 2019 | False | 93,89 | 2998780 | 19  | 2998780 | 3088165 | SRR7440835 |
| RL15000158 | Fish and fishery products | Fish Cold smoked                          | IE | 2011 | 121 | Painset et al. 2019 | false | 94,34 | 3032850 | 19  | 3032850 | 3068613 | SRR7441204 |
| RL15000160 | Fish and fishery products | Fish Smoked                               | IE | 2011 | 121 | Painset et al. 2019 | False | 95,83 | 3033680 | 6   | 3033680 | 3099044 | SRR7440605 |
| RL15000161 | Meat and meat products    | Gallus gallus (fowl) Fresh meat - Cut Raw | FR | 2011 | 121 | Painset et al. 2019 | False | 95,6  | 3002983 | 7   | 3002983 | 3068316 | SRR7440598 |



|            |                           |                                            |    |      |     |                     |       |       |         |     |         |         |            |
|------------|---------------------------|--------------------------------------------|----|------|-----|---------------------|-------|-------|---------|-----|---------|---------|------------|
| RL15000163 | Fish and fishery products | Fish Raw (Salmon)                          | FR | 2011 | 121 | Painset et al. 2019 | False | 95,73 | 3019440 | 11  | 3019440 | 3085984 | SRR7440600 |
| RL15000165 | Fish and fishery products | Fish (Salmon)                              | FR | 2011 | 121 | Painset et al. 2019 | false | 95,08 | 2995119 | 5   | 2995119 | 3060178 | SRR7440594 |
| RL15000166 | Fish and fishery products | Fish Raw (Salmon)                          | FR | 2011 | 121 | Painset et al. 2019 | False | 95,88 | 3033867 | 6   | 3033867 | 3098320 | SRR7441200 |
| RL15000167 | Fish and fishery products | Fish Raw (Trout)                           | FR | 2011 | 121 | Painset et al. 2019 | False | 95,47 | 3032852 | 5   | 3032852 | 3095897 | SRR7441144 |
| RL15000168 | Fish and fishery products | Fish Raw (Salmon)                          | FR | 2011 | 121 | Painset et al. 2019 | False | 95,31 | 3018136 | 15  | 3018136 | 3089666 | SRR7441143 |
| RL15000169 | Fish and fishery products | Fish Raw (Salmon)                          | FR | 2011 | 121 | Painset et al. 2019 | False | 95    | 2958669 | 11  | 2958669 | 3020567 | SRR7441146 |
| RL15000170 | Fish and fishery products | Fish Raw (Salmon)                          | FR | 2011 | 121 | Painset et al. 2019 | False | 94,3  | 2963597 | 34  | 2963597 | 3034528 | SRR7441145 |
| RL15000173 | Fish and fishery products | Fish Cold smoked                           | EE | 2011 | 121 | Painset et al. 2019 | False | 95,94 | 3033451 | 5   | 3033451 | 3095473 | SRR7441142 |
| RL15000174 | Fish and fishery products | Fish Wild fish Warm smoked                 | EE | 2011 | 121 | Painset et al. 2019 | false | 94,44 | 2950127 | 9   | 2950127 | 3020100 | SRR7441141 |
| RL15000178 | Meat and meat products    | Fish Deli product - Sliced Cooked (Salmon) | EL | 2011 | 121 | Painset et al. 2019 | False | 95,26 | 3065226 | 6   | 3065226 | 3096302 | SRR7440937 |
| RL15000181 | Fish and fishery products | Fish Warm smoked                           | SK | 2011 | 121 | Painset et al. 2019 | false | 94,73 | 2947786 | 205 | 2947786 | 3071789 | SRR7440932 |
| RL15000186 | Fish and fishery products | Fish Farmed fish Gravad/slightly salted    | AT | 2011 | 121 | Painset et al. 2019 | False | 94,67 | 2974212 | 70  | 2974212 | 3105227 | SRR7440940 |
| RL15000188 | Fish and fishery products | Fish Farmed fish Smoked                    | AT | 2011 | 121 | Painset et al. 2019 | False | 94,23 | 2970710 | 16  | 2970710 | 3079273 | SRR7441018 |

|            |                           |                                   |    |      |     |                     |       |       |         |    |         |         |            |
|------------|---------------------------|-----------------------------------|----|------|-----|---------------------|-------|-------|---------|----|---------|---------|------------|
| RL15000190 | Fish and fishery products | Fish Cold smoked                  | SI | 2011 | 121 | Painset et al. 2019 | False | 95,9  | 3097603 | 5  | 3097603 | 3098627 | SRR7441016 |
| RL15000197 | Fish and fishery products | Fish Cold smoked                  | DE | 2010 | 121 | Painset et al. 2019 | false | 95,83 | 3061561 | 5  | 3061561 | 3064342 | SRR7441283 |
| RL15000201 | Fish and fishery products | Fish Smoked                       | DE | 2010 | 121 | Painset et al. 2019 | false | 95,84 | 3034238 | 9  | 3034238 | 3098752 | SRR7441287 |
| RL15000202 | Meat and meat products    | Swine Deli products - Pate Cooked | DE | 2010 | 236 | Painset et al. 2019 | False | 95,89 | 3001080 | 5  | 3001080 | 3064517 | SRR7441288 |
| RL15000203 | Meat and meat products    | Swine Deli products - Pate Cooked | DE | 2010 | 236 | Painset et al. 2019 | False | 95,8  | 2993814 | 6  | 2993814 | 3057733 | SRR7441289 |
| RL15000206 | Fish and fishery products | Fish Cold smoked                  | DE | 2010 | 121 | Painset et al. 2019 | False | 95,86 | 3028439 | 7  | 3028439 | 3095434 | SRR7441276 |
| RL15000208 | Fish and fishery products | Fish Cold smoked                  | DE | 2010 | 121 | Painset et al. 2019 | False | 95,82 | 3061008 | 6  | 3061008 | 3065357 | SRR7441037 |
| RL15000214 | Fish and fishery products | Fish Cold smoked                  | DE | 2010 | 121 | Painset et al. 2019 | False | 95,88 | 3028541 | 7  | 3028541 | 3095570 | SRR7441031 |
| RL15000217 | Fish and fishery products | Fish Warm smoked                  | DE | 2010 | 121 | Painset et al. 2019 | False | 95,94 | 3036739 | 5  | 3036739 | 3099537 | SRR7440595 |
| RL15000218 | Fish and fishery products | Fish Cold smoked                  | DE | 2010 | 121 | Painset et al. 2019 | False | 95,87 | 2999939 | 5  | 2999939 | 3062194 | SRR7440863 |
| RL15000219 | Fish and fishery products | Fish Smoked                       | DE | 2010 | 121 | Painset et al. 2019 | False | 95,85 | 3000581 | 5  | 3000581 | 3062657 | SRR7440597 |
| RL15000223 | Fish and fishery products | Fish Cold smoked                  | DE | 2010 | 121 | Painset et al. 2019 | False | 95,83 | 2994889 | 10 | 2994889 | 3057976 | SRR7440593 |
| RL15000224 | Fish and fishery products | Fish Warm smoked                  | DE | 2010 | 121 | Painset et al. 2019 | False | 95,89 | 3033323 | 6  | 3033323 | 3097136 | SRR7440592 |

|            |                           |                                     |    |      |     |                     |       |       |         |    |         |         |            |
|------------|---------------------------|-------------------------------------|----|------|-----|---------------------|-------|-------|---------|----|---------|---------|------------|
| RL15000225 | Fish and fishery products | Fish Warm smoked                    | DE | 2010 | 121 | Painset et al. 2019 | False | 95,95 | 3035250 | 4  | 3035250 | 3096533 | SRR7440603 |
| RL15000226 | Fish and fishery products | Fish Cold smoked                    | DE | 2010 | 121 | Painset et al. 2019 | False | 95,97 | 3026962 | 7  | 3026962 | 3090649 | SRR7441203 |
| RL15000229 | Fish and fishery products | Fish Cold smoked                    | DE | 2010 | 121 | Painset et al. 2019 | False | 95,88 | 2999830 | 7  | 2999830 | 3062533 | SRR7440753 |
| RL15000230 | Fish and fishery products | Fish Cold smoked                    | DE | 2010 | 121 | Painset et al. 2019 | False | 95,92 | 3034269 | 8  | 3034269 | 3096975 | SRR7440754 |
| RL15000231 | Fish and fishery products | Fish Warm smoked                    | DE | 2010 | 121 | Painset et al. 2019 | False | 95,91 | 3033155 | 6  | 3033155 | 3095705 | SRR7440747 |
| RL15000233 | Fish and fishery products | Fish Cold smoked                    | DE | 2010 | 121 | Painset et al. 2019 | False | 95,77 | 3018090 | 10 | 3018090 | 3089260 | SRR7440749 |
| RL15000236 | Fish and fishery products | Fish Smoked                         | DE | 2011 | 121 | Painset et al. 2019 | False | 95,88 | 2996098 | 10 | 2996098 | 3064552 | SRR7440745 |
| RL15000237 | Fish and fishery products | Fish Cold smoked                    | DE | 2011 | 121 | Painset et al. 2019 | False | 94,34 | 2892058 | 18 | 2892058 | 2957521 | SRR7441301 |
| RL15000239 | Fish and fishery products | Fish Smoked                         | DE | 2011 | 121 | Painset et al. 2019 | False | 95,93 | 3031147 | 7  | 3031147 | 3094984 | SRR7441299 |
| RL15000240 | Fish and fishery products | Fish Cold smoked                    | DE | 2011 | 121 | Painset et al. 2019 | false | 95,95 | 3028390 | 4  | 3028390 | 3090006 | SRR7441298 |
| RL15000241 | Fish and fishery products | Fish Warm smoked                    | DE | 2011 | 121 | Painset et al. 2019 | False | 95,93 | 3031871 | 3  | 3031871 | 3093156 | SRR7441305 |
| RL15000242 | Meat and meat products    | Swine Deli product - Sausage Cooked | DE | 2011 | 236 | Painset et al. 2019 | False | 95,77 | 2989139 | 9  | 2989139 | 3053490 | SRR7441304 |
| RL15000243 | Meat and meat products    | Swine Deli product - Sausage Cooked | DE | 2011 | 121 | Painset et al. 2019 | False | 95,8  | 2987988 | 4  | 2987988 | 3049128 | SRR7441303 |

|            |                           |                                               |    |      |     |                     |       |       |         |   |         |         |            |
|------------|---------------------------|-----------------------------------------------|----|------|-----|---------------------|-------|-------|---------|---|---------|---------|------------|
| RL15000244 | Fish and fishery products | Fish Cold smoked                              | DE | 2011 | 121 | Painset et al. 2019 | False | 94,95 | 2932615 | 4 | 2932615 | 2995798 | SRR7441302 |
| RL15000246 | Fish and fishery products | Fish Farmed fish Gravad/slightly salted       | SE | 2010 | 121 | Painset et al. 2019 | False | 95,17 | 2912660 | 4 | 2912660 | 2974246 | SRR7441296 |
| RL15000251 | Fish and fishery products | Fish Farmed fish Gravad/slightly salted       | SE | 2010 | 121 | Painset et al. 2019 | False | 96,06 | 3029698 | 7 | 3029698 | 3092489 | SRR7441137 |
| RL15000252 | Fish and fishery products | Fish Smoked (process not specify)             | IT | 2011 | 121 | Painset et al. 2019 | False | 95,93 | 3028310 | 8 | 3028310 | 3093481 | SRR7441138 |
| RL15000253 | Fish and fishery products | Fish Farmed fish Smoked (process not specify) | IT | 2011 | 121 | Painset et al. 2019 | False | 95,88 | 3031526 | 8 | 3031526 | 3095394 | SRR7441135 |
| RL15000262 | Fish and fishery products | Fish Farmed fish Smoked (process not specify) | IT | 2011 | 121 | Painset et al. 2019 | False | 95,88 | 2962388 | 8 | 2962388 | 3028604 | SRR7440695 |
| RL15000269 | Fish and fishery products | Fish Farmed fish Gravad/slightly salted       | SE | 2010 | 121 | Painset et al. 2019 | False | 95,84 | 3003247 | 4 | 3003247 | 3064845 | SRR7440606 |
| RL15000276 | Fish and fishery products | Fish Farmed fish Smoked (process not specify) | IT | 2011 | 121 | Painset et al. 2019 | False | 95,84 | 2999014 | 7 | 2999014 | 3064234 | SRR7440618 |
| RL15000277 | Fish and fishery products | Fish Farmed fish Gravad/slightly salted       | SE | 2010 | 121 | Painset et al. 2019 | False | 95,08 | 2912547 | 6 | 2912547 | 2974695 | SRR7440929 |
| RL15000282 | Fish and fishery products | Fish Farmed fish Warm smoked                  | IT | 2011 | 121 | Painset et al. 2019 | False | 95,81 | 3033211 | 5 | 3033211 | 3096694 | SRR7440924 |
| RL15000284 | Fish and fishery products | Fish                                          | IT | 2011 | 121 | Painset et al. 2019 | False | 95,89 | 3073920 | 4 | 3073920 | 3135536 | SRR7440923 |
| RL15000287 | Fish and fishery products | Fish and fishery products Cold smoked         | NO | 2010 | 121 | Painset et al. 2019 | False | 95,88 | 2994006 | 6 | 2994006 | 3056017 | SRR7440921 |
| RL15000289 | Fish and fishery products | Fish and fishery products Cold smoked         | NO | 2010 | 121 | Painset et al. 2019 | False | 95,84 | 2991015 | 9 | 2991015 | 3056126 | SRR7440615 |

|            |                           |                                                    |    |      |     |                     |       |       |         |     |         |         |            |
|------------|---------------------------|----------------------------------------------------|----|------|-----|---------------------|-------|-------|---------|-----|---------|---------|------------|
| RL15000296 | Fish and fishery products | Fish Warm smoked                                   | FI | 2010 | 121 | Painset et al. 2019 | False | 95,73 | 3002554 | 7   | 3002554 | 3066398 | SRR7440610 |
| RL15000301 | Fish and fishery products | Fish Gravad/slightly salted                        | FI | 2010 | 121 | Painset et al. 2019 | False | 95,1  | 2953657 | 7   | 2953657 | 3018368 | SRR7440860 |
| RL15000333 | Fish and fishery products | Fish Warm smoked                                   | DE | 2011 | 121 | Painset et al. 2019 | False | 95,82 | 2997788 | 9   | 2997788 | 3063939 | SRR7440911 |
| RL15000336 | Fish and fishery products | Fish                                               | FI | 2010 | 121 | Painset et al. 2019 | False | 95,2  | 2954571 | 6   | 2954571 | 3018837 | SRR7440916 |
| RL15000347 | Meat and meat products    | Swine Deli product - Ham                           | CY | 2011 | 121 | Painset et al. 2019 | False | 95,89 | 2996377 | 4   | 2996377 | 3058507 | SRR7440548 |
| RL15000360 | Meat and meat products    | Gallus gallus (fowl) Meat - Cut                    | NL | 2012 | 121 | Painset et al. 2019 | False | 95,97 | 3049500 | 5   | 3049500 | 3111476 | SRR7440580 |
| RL15000411 | Milk and milk products    | Bovine Cheese category not specified               | FR | 2011 | 121 | Painset et al. 2019 | False | 95,82 | 3002795 | 5   | 3002795 | 3066261 | SRR7440882 |
| RL15000413 | Milk and milk products    | Unspecified Melted cheese                          | FR | 2011 | 121 | Painset et al. 2019 | False | 95,93 | 3078606 | 4   | 3078606 | 3140222 | SRR7440884 |
| RL15000456 | Milk and milk products    | Sheep Cheese category not specified                | SK | 2012 | 121 | Painset et al. 2019 | False | 94,91 | 2879675 | 4   | 2879675 | 2882088 | SRR7440736 |
| RL15000462 | Meat and meat products    | Unspecified Deli product - Sausage                 | FR | 2011 | 121 | Painset et al. 2019 | false | 95,35 | 2937240 | 234 | 2937240 | 3061543 | SRR7441184 |
| RL15000466 | Meat and meat products    | Poultry not specified Deli product - Other product | FR | 2011 | 121 | Painset et al. 2019 | False | 95,69 | 2998049 | 10  | 2998049 | 3064705 | SRR7441188 |
| RL15000469 | Meat and meat products    | Swine Deli product - Other product                 | FR | 2011 | 121 | Painset et al. 2019 | False | 95,78 | 2960137 | 4   | 2960137 | 3023320 | SRR7441168 |
| RL15000470 | Meat and meat products    | Swine Deli product - Other product                 | FR | 2011 | 121 | Painset et al. 2019 | False | 95,75 | 2959334 | 6   | 2959334 | 3023084 | SRR7441278 |
| RL15000471 | Meat and meat products    | Swine Deli product - Other product                 | FR | 2011 | 121 | Painset et al. 2019 | False | 95,74 | 2960079 | 6   | 2960079 | 3023803 | SRR7440938 |
| RL15000472 | Meat and meat products    | Swine Deli product - Other product                 | FR | 2011 | 121 | Painset et al. 2019 | False | 95,63 | 2959841 | 7   | 2959841 | 3024112 | SRR7441251 |
| RL15000484 | Meat and meat products    | Swine Deli product - Sausage                       | FR | 2011 | 121 | Painset et al. 2019 | False | 95,92 | 3001820 | 9   | 3001820 | 3064738 | SRR7440755 |
| RL15000485 | Meat and meat products    | Gallus gallus (fowl) Deli products - Pate          | FR | 2011 | 121 | Painset et al. 2019 | False | 95,28 | 2995759 | 6   | 2995759 | 3059555 | SRR7441279 |

|            |                           |                                                   |    |      |     |                     |       |       |         |    |         |         |            |
|------------|---------------------------|---------------------------------------------------|----|------|-----|---------------------|-------|-------|---------|----|---------|---------|------------|
| RL15000488 | Meat and meat products    | Unspecified Deli products - Pate                  | FR | 2011 | 121 | Painset et al. 2019 | False | 95,64 | 2962852 | 6  | 2962852 | 3028424 | SRR7441293 |
| RL15000494 | Meat and meat products    | Unspecified Deli product - Sausage                | FR | 2012 | 121 | Painset et al. 2019 | False | 95,07 | 2960858 | 6  | 2960858 | 3022782 | SRR7441048 |
| RL15000495 | Meat and meat products    | Swine Deli product - Sausage                      | FR | 2012 | 121 | Painset et al. 2019 | False | 95,87 | 3032968 | 13 | 3032968 | 3100060 | SRR7441179 |
| RL15000496 | Meat and meat products    | Unspecified Deli products - Pate                  | FR | 2012 | 121 | Painset et al. 2019 | False | 95,81 | 2959345 | 6  | 2959345 | 3023224 | SRR7441157 |
| RL15000498 | Meat and meat products    | Unspecified Deli products - Pate                  | FR | 2012 | 121 | Painset et al. 2019 | False | 95,69 | 3026911 | 4  | 3026911 | 3088527 | SRR7441110 |
| RL15000499 | Meat and meat products    | Unspecified Deli product - Sausage                | FR | 2012 | 176 | Painset et al. 2019 | False | 95,27 | 2963718 | 5  | 2963718 | 3027073 | SRR7440553 |
| RL15000501 | Meat and meat products    | Unspecified Deli product - Sausage                | FR | 2012 | 121 | Painset et al. 2019 | False | 95,83 | 2997932 | 8  | 2997932 | 3063996 | SRR7440799 |
| RL15000516 | Meat and meat products    | Unspecified Meat - Cut Cooked                     | DN | 2011 | 121 | Painset et al. 2019 | False | 95,02 | 3021076 | 6  | 3021076 | 3084908 | SRR7440870 |
| RL15000517 | Meat and meat products    | Unspecified Meat - Cut Cooked                     | DN | 2011 | 121 | Painset et al. 2019 | false | 95,03 | 3018917 | 21 | 3018917 | 3088480 | SRR7440873 |
| RL15000526 | Meat and meat products    | Unspecified Meat - Cut Sliced                     | DN | 2012 | 121 | Painset et al. 2019 | False | 95,89 | 3033380 | 5  | 3033380 | 3096717 | SRR7440672 |
| RL15000532 | Meat and meat products    | Unspecified Meat - Cut Sliced                     | DN | 2011 | 121 | Painset et al. 2019 | False | 95,01 | 2933685 | 4  | 2933685 | 2995301 | SRR7441231 |
| RL15000660 | Meat and meat products    | unspecifed (spain)                                | ES | 2010 | 121 | Painset et al. 2019 | False | 95,99 | 3032479 | 4  | 3032479 | 3094095 | SRR7440717 |
| RL15000661 | Meat and meat products    | Swine Deli product - Ham Smoked                   | ES | 2010 | 121 | Painset et al. 2019 | False | 95,98 | 3032701 | 5  | 3032701 | 3094681 | SRR7440639 |
| RL15000664 | Meat and meat products    | Gallus gallus (fowl) Deli product - Other product | ES | 2011 | 121 | Painset et al. 2019 | False | 95,98 | 3034902 | 5  | 3034902 | 3098339 | SRR7440852 |
| RL15000667 | Meat and meat products    | Swine Deli product - Sliced Cooked                | ES | 2011 | 121 | Painset et al. 2019 | False | 95,91 | 3034176 | 5  | 3034176 | 3095960 | SRR7440653 |
| RL15000668 | Fish and fishery products | Fish Smoked (Salmon)                              | ES | 2011 | 121 | Painset et al. 2019 | False | 96,04 | 3032923 | 10 | 3032923 | 3099223 | SRR7440658 |
| RL15000671 | Fish and fishery products | Fish Smoked (Salmon)                              | ES | 2011 | 121 | Painset et al. 2019 | False | 95,99 | 3067918 | 14 | 3067918 | 3142084 | SRR7440555 |
| RL15000674 | Fish and fishery products | Fish Smoked (Salmon)                              | ES | 2011 | 121 | Painset et al. 2019 | False | 95,98 | 3076276 | 6  | 3076276 | 3139994 | SRR7440566 |

|            |                           |                                        |    |      |     |                     |       |       |         |    |         |         |            |
|------------|---------------------------|----------------------------------------|----|------|-----|---------------------|-------|-------|---------|----|---------|---------|------------|
| RL15000675 | Fish and fishery products | Fish Smoked (Salmon)                   | ES | 2011 | 121 | Painset et al. 2019 | False | 95,85 | 3040488 | 9  | 3040488 | 3106467 | SRR7441029 |
| RL15000682 | Meat and meat products    | Geese Deli product - Sliced Cooked     | ES | 2011 | 121 | Painset et al. 2019 | False | 95,93 | 3031198 | 6  | 3031198 | 3094988 | SRR7441178 |
| RL15000685 | Fish and fishery products | Fish Smoked (Salmon)                   | ES | 2011 | 121 | Painset et al. 2019 | False | 96    | 3036488 | 3  | 3036488 | 3097774 | SRR7441310 |
| RL15000687 | Meat and meat products    | Swine Deli product - Sliced Cooked     | ES | 2011 | 121 | Painset et al. 2019 | False | 95,97 | 2987536 | 27 | 2987536 | 3065948 | SRR7441109 |
| RL15000689 | Fish and fishery products | Fish Smoked (Salmon)                   | ES | 2011 | 121 | Painset et al. 2019 | False | 95,05 | 2933107 | 6  | 2933107 | 2995229 | SRR7441045 |
| RL15000692 | Fish and fishery products | Fish Smoked                            | ES | 2011 | 121 | Painset et al. 2019 | False | 95,83 | 3039863 | 10 | 3039863 | 3114518 | SRR7441111 |
| RL15000693 | Fish and fishery products | Fish Gravad/slightly salted (Salmon)   | ES | 2011 | 121 | Painset et al. 2019 | False | 95,88 | 3042661 | 9  | 3042661 | 3115994 | SRR7441307 |
| RL15000705 | Meat and meat products    | Gallus gallus (fowl) Meat - Cut Cooked | ES | 2010 | 121 | Painset et al. 2019 | False | 95,67 | 2987373 | 7  | 2987373 | 3052632 | SRR7441194 |
| RL15000707 | Composite dishes          | Mixed sources Sandwich                 | ES | 2010 | 121 | Painset et al. 2019 | False | 95,96 | 3032981 | 3  | 3032981 | 3094267 | SRR7440731 |
| RL15000709 | Composite dishes          | Mixed sources Ready made meal          | ES | 2010 | 121 | Painset et al. 2019 | False | 94,98 | 2933591 | 61 | 2933591 | 3016426 | SRR7440763 |
| RL15000712 | Meat and meat products    | Swine Deli product - Sausage           | ES | 2010 | 121 | Painset et al. 2019 | False | 95,94 | 3015712 | 12 | 3015712 | 3085411 | SRR7440620 |
| RL15000713 | Meat and meat products    | Swine Deli product - Sausage           | ES | 2010 | 121 | Painset et al. 2019 | False | 95,92 | 3018512 | 8  | 3018512 | 3084638 | SRR7440729 |
| RL15000718 | Composite dishes          | Mixed sources Ready made meal          | ES | 2010 | 121 | Painset et al. 2019 | False | 95,35 | 2959139 | 3  | 2959139 | 3020410 | SRR7441334 |
| RL15000720 | Meat and meat products    | Unspecified Meat - Minced              | ES | 2011 | 121 | Painset et al. 2019 | False | 95,95 | 3033583 | 6  | 3033583 | 3097412 | SRR7440866 |
| RL15000724 | Composite dishes          | Mixed sources Ready to eat salad       | ES | 2011 | 121 | Painset et al. 2019 | False | 96,11 | 2985295 | 15 | 2985295 | 3055080 | SRR7440868 |
| RL15000731 | Fish and fishery products | Fish Smoked (Salmon)                   | CZ | 2010 | 121 | Painset et al. 2019 | False | 95,91 | 3093884 | 7  | 3093884 | 3095946 | SRR7441075 |

|                |                                      |                                                    |    |      |     |                     |       |       |         |     |         |         |                           |
|----------------|--------------------------------------|----------------------------------------------------|----|------|-----|---------------------|-------|-------|---------|-----|---------|---------|---------------------------|
| RL15001299     | Meat and meat products               | Bovine Meat - Cut                                  | UK | 2010 | 121 | Painset et al. 2019 | False | 96,04 | 3083146 | 4   | 3083146 | 3144675 | SRR7440549                |
| RL15001300     | Meat and meat products               | Poultry not specified Deli product - Other product | UK | 2010 | 121 | Painset et al. 2019 | False | 95,89 | 3049492 | 16  | 3049492 | 3115903 | SRR7440539                |
| RL15001301     | Meat and meat products               | Swine Deli product - Ham                           | UK | 2011 | 121 | Painset et al. 2019 | False | 95,36 | 3124574 | 7   | 3124574 | 3194162 | SRR7440540                |
| RL15001981     | Fruit, vegetables, cereals and herbs | Vegetal Vegetable                                  | UK | 2010 | 121 | Painset et al. 2019 | False | 95,7  | 2964659 | 5   | 2964659 | 3026278 | SRR7441191                |
| SE-FI-F-FF-115 | Fish and fishery products            | Gravad Salmon - - Distributed by Denmark - fish    | SE | 2010 | 121 | Felix et al. 2020   | False | 95,68 | 2994288 | 2   | 2994288 | 3055294 | ERS4774958 (SAMEA7007130) |
| SE-FI-F-FF-24  | Fish and fishery products            | Gravad Salmon - - Sweden - fish                    | SE | 2010 | 121 | Felix et al. 2020   | False | 94,88 | 2912456 | 2   | 2912456 | 2973523 | ERS4774962 (SAMEA7007134) |
| SE-FI-F-FF-29  | Fish and fishery products            | Gravad Salmon - - Sweden - fish                    | SE | 2010 | 121 | Felix et al. 2020   | False | 95,5  | 3094363 | 4   | 3094363 | 3095712 | ERS4774963 (SAMEA7007135) |
| SE-FI-F-FF-30  | Fish and fishery products            | Gravad Salmon - - Sweden - fish                    | SE | 2010 | 121 | Felix et al. 2020   | False | 95,01 | 3011698 | 1   | 3011698 | 3011698 | ERS4774964 (SAMEA7007136) |
| SE-FI-F-SM-18  | Fish and fishery products            | Cold smoked trout - - Sweden - fish                | SE | 2010 | 121 | Felix et al. 2020   | False | 95,57 | 3066231 | 1   | 3066231 | 3066231 | ERS4774971 (SAMEA7007143) |
| SE-FI-F-SM-22  | Fish and fishery products            | Cold smoked salmon - - Sweden - fish               | SE | 2010 | 121 | Felix et al. 2020   | False | 94,67 | 2914096 | 111 | 2914096 | 3004762 | ERS4774972 (SAMEA7007144) |
| SE-FI-F-SM-26  | Fish and fishery products            | Cold smoked salmon - - Sweden - fish               | SE | 2010 | 121 | Felix et al. 2020   | False | 95,66 | 3004201 | 3   | 3004201 | 3065789 | ERS4774975 (SAMEA7007147) |
| SE-FI-F-SM-28  | Fish and fishery products            | Cold smoked salmon - - Sweden - fish               | SE | 2010 | 121 | Felix et al. 2020   | False | 95,49 | 3064940 | 29  | 3064940 | 3072350 | ERS4774977 (SAMEA7007149) |
| SE-FI-F-SM-33  | Fish and fishery products            | Cold smoked salmon - - Sweden - fish               | SE | 2010 | 121 | Felix et al. 2020   | False | 95,02 | 3039919 | 5   | 3039919 | 3041647 | ERS4774979 (SAMEA7007151) |



|               |                           |                                                     |    |      |     |                   |       |       |         |     |         |         |                           |
|---------------|---------------------------|-----------------------------------------------------|----|------|-----|-------------------|-------|-------|---------|-----|---------|---------|---------------------------|
| SE-FI-F-SM-35 | Fish and fishery products | Cold smoked salmon - - Sweden - fish                | SE | 2010 | 121 | Felix et al. 2020 | False | 94,91 | 2974219 | 1   | 2974219 | 2974219 | ERS4774980 (SAMEA7007152) |
| SE-FI-F-SM-36 | Fish and fishery products | Cold smoked salmon - - Sweden - fish                | SE | 2010 | 121 | Felix et al. 2020 | false | 96,53 | 3071544 | 120 | 3071544 | 3226349 | #N/A                      |
| SE-FI-F-SM-39 | Fish and fishery products | Gravad Salmon - - Sweden - fish                     | SE | 2010 | 121 | Felix et al. 2020 | False | 94,94 | 3016306 | 1   | 3016306 | 3016306 | ERS4774983 (SAMEA7007155) |
| SE-FI-F-SM-41 | Fish and fishery products | Cold smoked salmon - - Sweden - fish                | SE | 2010 | 121 | Felix et al. 2020 | False | 95,49 | 3062956 | 2   | 3062956 | 3063568 | ERS4774985 (SAMEA7007157) |
| SE-FI-F-SM-43 | Fish and fishery products | Cold smoked salmon - - Sweden - fish                | SE | 2010 | 121 | Felix et al. 2020 | False | 94,91 | 2912950 | 4   | 2912950 | 2974755 | ERS4774987 (SAMEA7007159) |
| SE-PE-FI-M-52 | Processing environment    | - Slicer, transportingband - Sweden - fish          | SE | 2010 | 121 | Felix et al. 2020 | False | 95,49 | 3004526 | 2   | 3004526 | 3065623 | ERS4774996 (SAMEA7007168) |
| SE-PE-FI-M-80 | Processing environment    | - Trolley nr 50 (cold smoked) - Sweden - fish       | SE | 2014 | 121 | Felix et al. 2020 | False | 95,62 | 3056157 | 2   | 3056157 | 3056438 | ERS4774997 (SAMEA7007169) |
| SE-PE-FI-M-90 | Processing environment    | - Transport band - Sweden - fish                    | SE | 2014 | 121 | Felix et al. 2020 | False | 95,62 | 3003100 | 22  | 3003100 | 3069192 | ERS4774998 (SAMEA7007170) |
| SE-PE-ME-D-84 | Processing environment    | - Drain price room - Sweden - meat                  | SE | 2014 | 121 | Felix et al. 2020 | False | 95,33 | 3062460 | 24  | 3062460 | 3068897 | ERS4775004 (SAMEA7007176) |
| SE-PE-ME-M-66 | Processing environment    | - chopping room/chopping machine - Sweden - meat    | SE | 2010 | 121 | Felix et al. 2020 | False | 95,55 | 3061196 | 7   | 3061196 | 3063486 | ERS4775005 (SAMEA7007177) |
| SE-PE-ME-M-69 | Processing environment    | - Transport band to slicing machine - Sweden - meat | SE | 2010 | 121 | Felix et al. 2020 | False | 95    | 2950730 | 17  | 2950730 | 3017608 | ERS4775007 (SAMEA7007179) |
| SE-PE-ME-M-73 | Processing environment    | - Sausagefiller - Sweden - meat                     | SE | 2014 | 121 | Felix et al. 2020 | False | 95,52 | 3061321 | 5   | 3061321 | 3062865 | ERS4775009 (SAMEA7007181) |
| SE-PE-ME-M-74 | Processing environment    | - transport band going in - Sweden - meat           | SE | 2014 | 121 | Felix et al. 2020 | False | 95,46 | 3036400 | 1   | 3036400 | 3036400 | ERS4775010 (SAMEA7007182) |
| SE-PE-ME-M-81 | Processing environment    | - Paté chopping machine - Sweden - meat             | SE | 2014 | 121 | Felix et al. 2020 | False | 95,24 | 2970063 | 19  | 2970063 | 3035515 | ERS4775015 (SAMEA7007187) |
| SE-PE-ME-M-89 | Processing environment    | - Blade - Sweden - meat                             | SE | 2014 | 121 | Felix et al. 2020 | False | 95,58 | 3095587 | 29  | 3095587 | 3105868 | ERS4775021 (SAMEA7007193) |
| SE-PE-ME-S-58 | Processing environment    | - Floor drain - ham polishing - Sweden - meat       | SE | 2010 | 236 | Felix et al. 2020 | False | 95,29 | 3025634 | 10  | 3025634 | 3028631 | ERS4775028 (SAMEA7007200) |
| SI-FAR-WT-51  | Soil & farm environment   | Environnement agricole eau                          | SI | 2008 | 121 | Typelipo          | False | 95,47 | 3083305 | 3   | 3083305 | 3084036 | ERS4775061 (SAMEA7007233) |

|               |              |                 |    |      |     |                           |       |       |         |    |         |         |                           |
|---------------|--------------|-----------------|----|------|-----|---------------------------|-------|-------|---------|----|---------|---------|---------------------------|
| SLCC2216      | animal       | unknow          | FR | 1964 | 121 | seelinger collection      | False | 94,59 | 2905441 | 10 | 2905441 | 2971357 | #N/A                      |
| SLCC3296      | animal       | unknow          | DE | 1970 | 121 | seelinger collection      | False | 95,47 | 2953689 | 8  | 2953689 | 3019949 | #N/A                      |
| SLCC3306      | animal       | unknow          | DE | 1970 | 121 | seelinger collection      | False | 94,1  | 2871603 | 14 | 2871603 | 2939436 | #N/A                      |
| SRR6116310    | Farm animals | bovine brain    | US | 2017 | 121 | Pirone-Davies et al. 2018 | False | 95,32 | 2964303 | 1  | 2964303 | 2964303 | SRR6116310                |
| SRR6116326    | Farm animals | bovine abortion | US | 2017 | 121 | Pirone-Davies et al. 2019 | False | 95,45 | 2923380 | 1  | 2923380 | 2923380 | SRR6116326                |
| UK-VE-U-UN-93 | vegetable    | #N/A            | UK | 2018 | 121 | Felix et al. 2020         | False | 95,63 | 3028446 | 7  | 3028446 | 3030249 | ERS4775197 (SAMEA7007369) |
| UK-OTH-FE-U5  | Wild animals | Hedgehog        | UK | ND   | 121 | Felix et al. 2020         | False | 95,78 | 3030228 | 6  | 3030228 | 3095274 | #N/A                      |
